# Supplementary material
Source: MDPI journal article supplement (https://www.mdpi.com/2227-9040/11/10/547)
Supplement: s1 [file s1 › chemosensors-2605870-supplementary.pdf]

## Supplementary Materials

# Contamination- and Perturbation-Free Fluorescent Monitoring of $\text{Zn}^{2+}$ in Suspensions using Crown Ether-Functionalized Magnetic Nanoparticles

Panna Vezse<sup>1</sup>, Ádám Golcs<sup>1,2,\*</sup>, Tünde Tóth<sup>1,3</sup>, Péter Huszthy<sup>1,\*</sup>

<sup>1</sup> Department of Organic Chemistry and Technology, Budapest University of Technology and Economics, Szent Gellért tér 4, H-1111 Budapest, Hungary

<sup>2</sup> Department of Pharmaceutical Chemistry, Semmelweis University, Högyes Endre utca 9, H-1092 Budapest, Hungary

<sup>3</sup> Centre for Energy Research, Konkoly-Thege Miklós út 29-33, H-1121 Budapest, Hungary

\* Correspondence: golcs.adam@edu.bme.hu (Á.G.); huszthy.peter@vbk.bme.hu (P.H.)

## Contents

1. Supplementary information regarding ICP-OES measurements
2. Composition of river water samples
3. Composition of the pumpkin seed flour
4. UV-calibration for determining the concentration of fluoroionophore **1** in solution
5. Determination of LOD

## 1. Supplementary information regarding ICP-OES measurements

Sample solutions were measured in simultaneous, multielement mode by a Labtest Plasmalab ICP-spectrometer (Labtest Equipment Company, USA) with a 40-channel Paschen-Runge vacuum polychromator with photomultiplier detectors, using 27 MHz argon plasma. Instrument settings were the following, forward power: 1.3 kW, sample introduction with a “OneNeb” nebulizer (Agilent Technologies, USA), cyclonic spray chamber and Gilson peristaltic pump (Gilson Company, USA) at 1 mL min<sup>-1</sup> sample flow rate, observation height: 13.5 mm, integration time: 5 s. Limit of quantitation for Ag was 0.025 mg·L<sup>-1</sup>, (wavelength: 328.068 nm), for Ca was 0.03 mg·L<sup>-1</sup>, (wavelength: 422.673 nm), for Co was 0.019 mg·L<sup>-1</sup>, (wavelength: 238.892 nm), for Cu was 0.025 mg·L<sup>-1</sup>, (wavelength: 224.700 nm), for K was 0.05 mg·L<sup>-1</sup>, (wavelength: 766.491 nm), for Mg was 0.0005 mg·L<sup>-1</sup>, (wavelength: 279.553 nm), for Na was 0.19 mg·L<sup>-1</sup>, (wavelength: 589.592 nm), for Pb was 0.13 mg·L<sup>-1</sup>, (wavelength: 220.353 nm), and for Zn was 0.005 mg·L<sup>-1</sup>, (wavelength: 213.856 nm).

## 2. Composition of river water samples

The river water samples were collected from river Danube in Budapest (GPS coordinates: 47°29'06.5"N 19°03'11.8"E, 2021.02.16. 10<sup>00</sup>). The metal ion compositions were determined by ICP-OES method after filtering and acidifying the samples by nitric acid (**Table S1**).

**Table S1.** Metal ion composition of the investigated river water samples determined by ICP-OES

| Elements | River water<br>(mg·L <sup>-1</sup> ) |
|----------|--------------------------------------|
| Ag       | <0.02                                |
| Al       | <0.09                                |
| As       | <0.07                                |
| B        | <0.01                                |
| Ba       | 0.03                                 |
| Be       | <0.01                                |
| Bi       | <0.19                                |
| Ca       | 59.8                                 |
| Cd       | 0.01                                 |
| Co       | <0.02                                |
| Cr       | <0.02                                |
| Cu       | <0.02                                |
| Fe       | 0.07                                 |
| Hg       | <0.01                                |
| K        | 3.21                                 |
| Li       | <0.06                                |
| Mg       | 12.20                                |
| Mn       | <0.01                                |
| Mo       | <0.02                                |
| Na       | 19.9                                 |
| Ni       | <0.04                                |
| P        | 0.43                                 |

|           |             |
|-----------|-------------|
| Pb        | 0.01        |
| S         | 12.5        |
| Sb        | <0.13       |
| Se        | <0.23       |
| Sn        | <0.08       |
| Sr        | 0.23        |
| Ti        | <0.01       |
| V         | <0.02       |
| W         | <0.09       |
| <b>Zn</b> | <b>0.05</b> |
| Zr        | <0.02       |

### 3. Composition of the pumpkin seed flour

The composition of the commercially available pumpkin seed flour can be found in **Table S2**.

**Table S2.** Composition of the investigated pumpkin seed flour calculated for 100 g

| <b>Components</b>                    | <b>Pumpkin seed flour<br/>(mg/100 g)</b> |
|--------------------------------------|------------------------------------------|
| Protein                              | 40000                                    |
| Fibre                                | 6000                                     |
| Carbohydrates                        | 1500                                     |
| Total fat                            | 14000                                    |
| Ash                                  | 4900                                     |
| Calcium                              | 65                                       |
| Iron                                 | 22                                       |
| Magnesium                            | 810                                      |
| Phosphorus                           | 1700                                     |
| <b>Zinc</b>                          | <b>12</b>                                |
| Copper                               | 2                                        |
| Manganese                            | 5                                        |
| Potassium                            | 1200                                     |
| Sodium                               | 436                                      |
| Sulphur                              | 63                                       |
| Chloride                             | 58                                       |
| Vitamins and other<br>trace elements |                                          |

#### 4. UV-calibration for determining the concentration of fluoroionophore 1 in solution

The ratio of the immobilized ionophore was determined based on UV-calibration in chloroform (**Figure S1** and **Figure S2**).

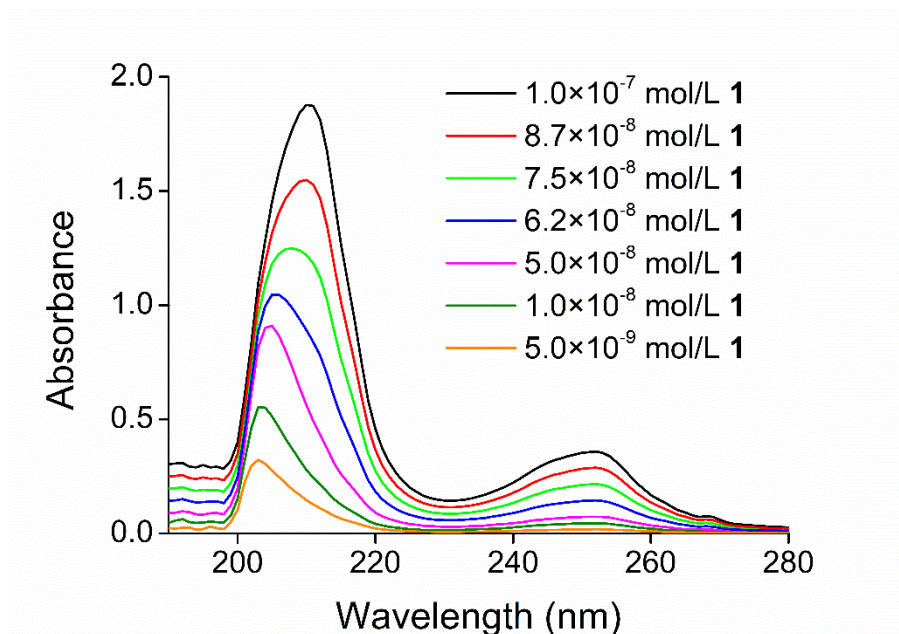

**Figure S1.** Concentration-dependent absorption of fluoroionophore 1 in chloroform

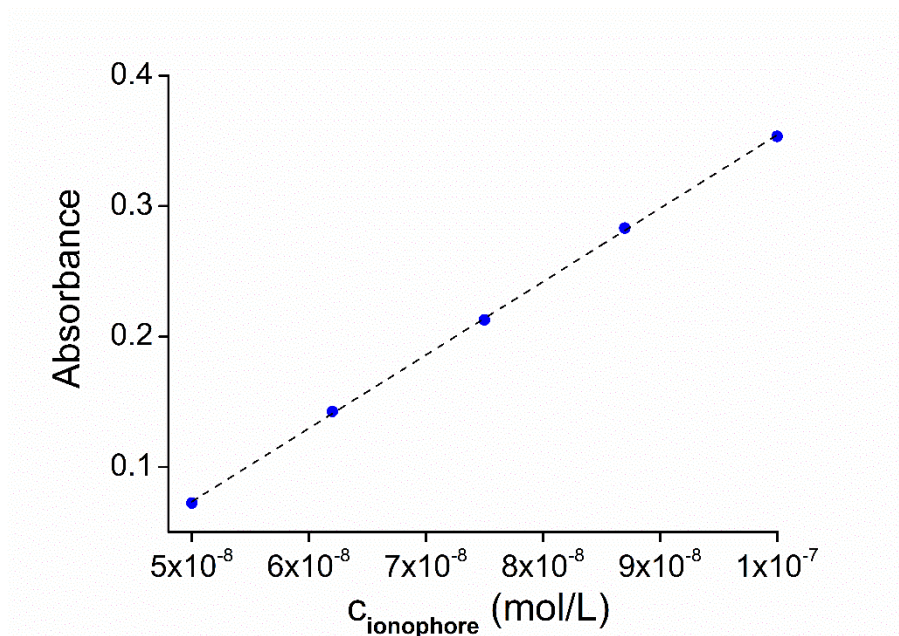

**Figure S2.** UV-absorbance-based calibration curve of fluoroionophore 1 at 250 nm used for calculating its concentration ( $R^2 = 0.99$ )

## 5. Determination of LOD

Detection limits were calculated based on data of the fluorescence titrations. To determine the signal-to-noise ratio, the fluorescence intensity of the sensor membrane was measured 9 times and the standard deviation of these blank measurements was determined as 9.0.

Three separate measurements of the emission intensity were performed in the presence of low concentrations of  $\text{Zn}^{2+}$  and the average of the intensities was plotted as a function of concentration to determine the slope of the linear regression (**Figure S3**).

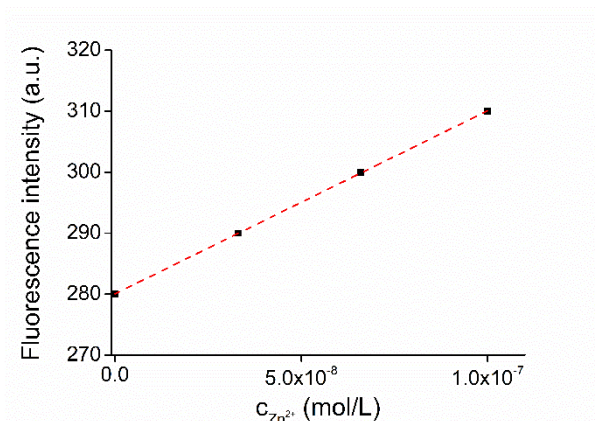

**Figure S3.** Linear regression for the optochemical responses in the presence of low concentrations of  $\text{Zn}^{2+}$

The equation of the linear regression line is as follows:  $F_{\text{obs}(370 \text{ nm})} = 3 \cdot 10^8 c_{\text{Zn}^{2+}} + 280$ ,  $R^2=0.99$ . The LOD was calculated with the following equation:

$$LOD = \frac{3d}{S} \quad (1)$$

where  $d$  is the standard deviation of the optical signal of the sensor membrane ( $d=9.0$ ) and  $S$  is the slope of linear regression for the emission intensities as a function of the concentration of  $\text{Zn}^{2+}$  ( $S=3 \times 10^8$ ).
